# Supplementary material
Source: publisher site journal article supplement (https://www.dovepress.com/article/351618)
Supplement: Supplementary file 1 [file get_supplementary_file.php]

**Supplementary Table S1.** Comparison of Pretreatment and Post-treatment OCTA Metrics by Group.

|  | Early Response Group | | | | Treatment Refractory Group | | | |
| --- | --- | --- | --- | --- | --- | --- | --- | --- |
|  | Pretreatment | Post-treatment | Change (%) | P-valuea | Pretreatment | Post-treatment | Change (%) | P-valuea |
| LogMAR BCVA [Letters] | 0.84±0.41  [43.2±20.5] | 0.48±0.33 [60.7±16.6] | -0.35±0.32 (-42%) [17.6±15.8] | <0.001b | 0.51±0.15  [59.7±7.5] | 0.44±0.15 [62.9±7.8] | -0.07±0.07 (-14%) [3.3±3.4] | 0.001b |
| CMT, µm | 490±135 | 306±77 | -184±133 (-37.6%) | <0.0001b | 353±70 | 359±91 | 5±34 (1.4%) | 0.624 |
| PFT, µm | 456±88 | 355±50 | -101±74 (-22%) | <0.0001b | 371±33 | 372±42 | 1.5±24 (0.4%) | 0.794 |
| FAZ area, mm2 | 0.309±0.098 | 0.346±0.107 | 0.036±0.059 (11.6%) | 0.019b | 0.413±0.095 | 0.451±0.193 | 0.037±0.128 (9%) | 0.238 |
| SCP VD, %  Whole image  Fovea (1 mm)  Parafovea (total)  Temporal PF  Superior PF  Nasal PF  Inferior PF  Perifovea (total) | 42.87±4.49  24.86±6.9  43.49±5.51  44.65±5.04  44.14±6.08  42.16±6.29  43.06±7.16  42.25±4.46 | 43.03±5.78  20.7±7  42.64±7.01  43.44±6.16  43.41±7.78  41.21±7.46  42.49±8.13  41.79±4.8 | 0.16±3.71 (0.4%)  -4.15±5.87 (-17%)  -0.86±4.35 (-2%)  -1.23±4.59 (-2.8%)  -0.73±4.94 (-1.7%)  -0.94±5.47 (-2.2%)  -0.57±4.92 (-1.3%)  -0.46±3.57 (-1.1%) | 0.856  0.008b  0.416  0.273  0.539  0.474  0.628  0.665 | 40.37±3.77  19.98±7.1  39.19±5.19  40.75±4.86  38.22±5.47  38.17±7.53  39.65±5.39  41.19±3.65 | 38.89±3.35  16.6±7.1  37.43±4.22  37.93±4.95  36.8±4.61  37.25±4.51  37.76±6.93  39.91±3.57 | -1.48±2.74 (-3.7%)  -3.42±7.01 (-17%)  -1.77±3.94 (-4.5%)  -2.82±5.05 (-6.9%)  -1.42±4.19 (-3.7%)  -0.92±6.19 (-2.4%)  -1.89±4.86 (-4.8%)  -1.28±2.84 (-3.1%) | 0.035b  0.054  0.074  0.03b  0.168  0.536  0.118  0.091 |
| DCP VD, %  Whole image  Fovea (1 mm)  Parafovea (total)  Temporal PF  Superior PF  Nasal PF  Inferior PF  Perifovea (total) | 42.07±2.36  32.3±4.88  46.98±4.43  49.32±4.12  45.58±5.66  46.45±5.55  46.58±5.26  42.82±2.95 | 41.7±3.18  28.9±7.2  46.38±2.03  47.64±3.45  45.49±3.24  47.07±2.85  45.33±3.7  42.4±3.37 | -0.37±4.02 (-0.9%)  -3.4±4.93 (-10.5%)  -0.6±4.48 (-1.3%)  -1.68±3.71 (-3.4%)  -0.09±6.62 (-0.2%)  0.62±4.5 (1.3%)  -1.26±6.69  -0.42±4.39 | 0.758  0.036b  0.651  0.146  0.963  0.645  0.528  0.749 | 41.18±2.92  26.95±7.25  46.14±4.73  47.03±4.13  44.61±5.27  46.39±5.98  46.58±5.66  42.04±3.13 | 41.06±3.27  25.5±6.4  46.73±3.97  47.76±4.25  45.77±3.74  47.66±5.6  45.75±4.03  41.73±3.75 | -0.12±3.18 (-0.3%)  -1.45±7.56 (-5.4%)  0.58±3.59 (1.3%)  0.73±3.45 (1.6%)  1.16±3.39 (2.6%)  1.27±4.9 (2.7%)  -0.83±5.61 (-1.8%)  -0.31±3.91 (-0.7%) | 0.883  0.455  0.527  0.409  0.19  0.317  0.565  0.758 |

a Comparison of post-treatment to pre-treatment values.

b Statistically significant difference, i.e. P < 0.05

BCVA, best corrected visual acuity; CMT, central macular thickness; DCP, deep capillary plexus; FAZ, foveal avascular zone; PFT, parafoveal thickness; SCP, superficial capillary plexus; VD, vascular density.
